# Supplementary material for: Chemical modification of poly(isosorbide carbonate)-based copolymers with boronic acids and the ammonolysis of the modified copolymers
Source: Royal Society of Chemistry journal article supplement (doi:10.1039/d4py01365d), 2025-01-01
Supplement: d4py01365d1.pdf [file d4py01365d1.pdf]

Supplementary Information

# Chemical modification of poly(isosorbide carbonate)-based copolymers with boronic acids and the ammonolysis of the modified copolymers

Kazuaki Rikiyama<sup>a</sup>, Akari Matsunami<sup>a</sup>, Shunsuke Fujimata<sup>a</sup>, Tatsuo Taniguchi<sup>a</sup>,  
and Daisuke Aoki<sup>a\*</sup>

<sup>a</sup> Department of Applied Chemistry and Biotechnology, Graduate School of Engineering, Chiba University,  
1-33 Yayoi-cho, Inage-ku, Chiba-shi, Chiba 263-8522, Japan.

Corresponding Authors  
\* D. Aoki. Email: daoki@chiba-u.jp

## Table of Contents

|                                                                                             |     |
|---------------------------------------------------------------------------------------------|-----|
| 1. Enlarged <sup>1</sup> H NMR spectra of <b>P(IC-co-DBMC)</b> and <b>P(IC-co-MC)</b> ..... | S2  |
| 2. DOSY spectrum of <b>P(IC-co-MC)PB</b> .....                                              | S3  |
| 3. Synthesis and deprotection of <b>P(nBA-co-PB)</b> .....                                  | S4  |
| 4. Photo of processed polymers.....                                                         | S6  |
| 5. Thermal property of <b>P(nBA-co-PB)</b> .....                                            | S7  |
| 6. Frequency dependence of G' and G''.....                                                  | S8  |
| 7. Ammonolysis of <b>P(IC-co-MC)</b> and <b>P(IC-co-MC)PB</b> at 30 °C.....                 | S9  |
| 8. DOSY spectrum of the decomposed <b>P(IC-co-MC)PDB</b> .....                              | S11 |
| 9. <sup>1</sup> H NMR spectrum of decomposition product of polymer mixture.....             | S12 |

## 1. Enlarged $^1\text{H}$ NMR spectra of P(IC-co-DBMC) and P(IC-co-MC)

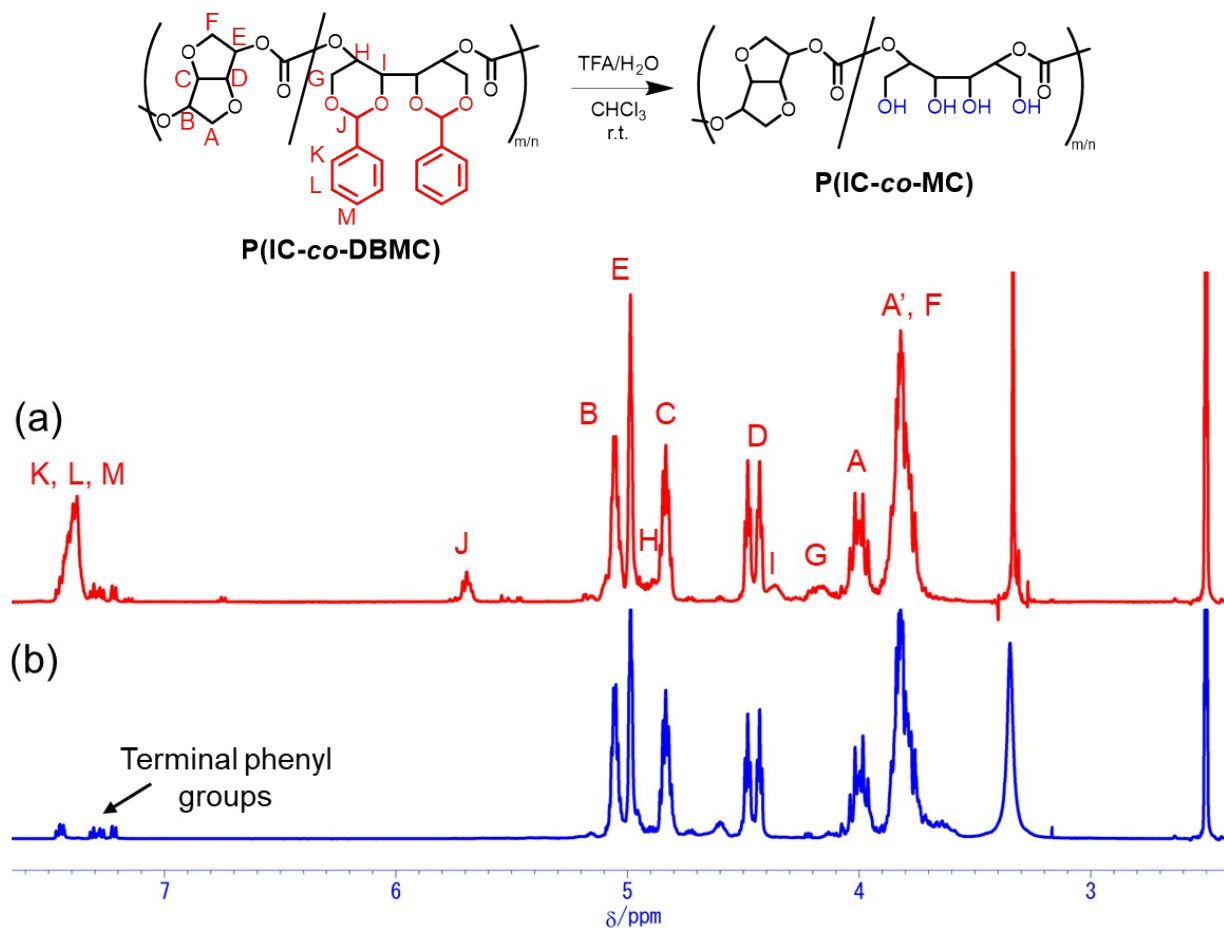

Figure S1. Enlarged  $^1\text{H}$  NMR spectra of (a) phenylboronic acid, (a) P(IC-co-DBMC) and (b) P(IC-co-MC) (500 MHz, 25 °C, DMSO-*d*<sub>6</sub>).

## 2. DOSY spectrum of P(IC-co-MC)PB

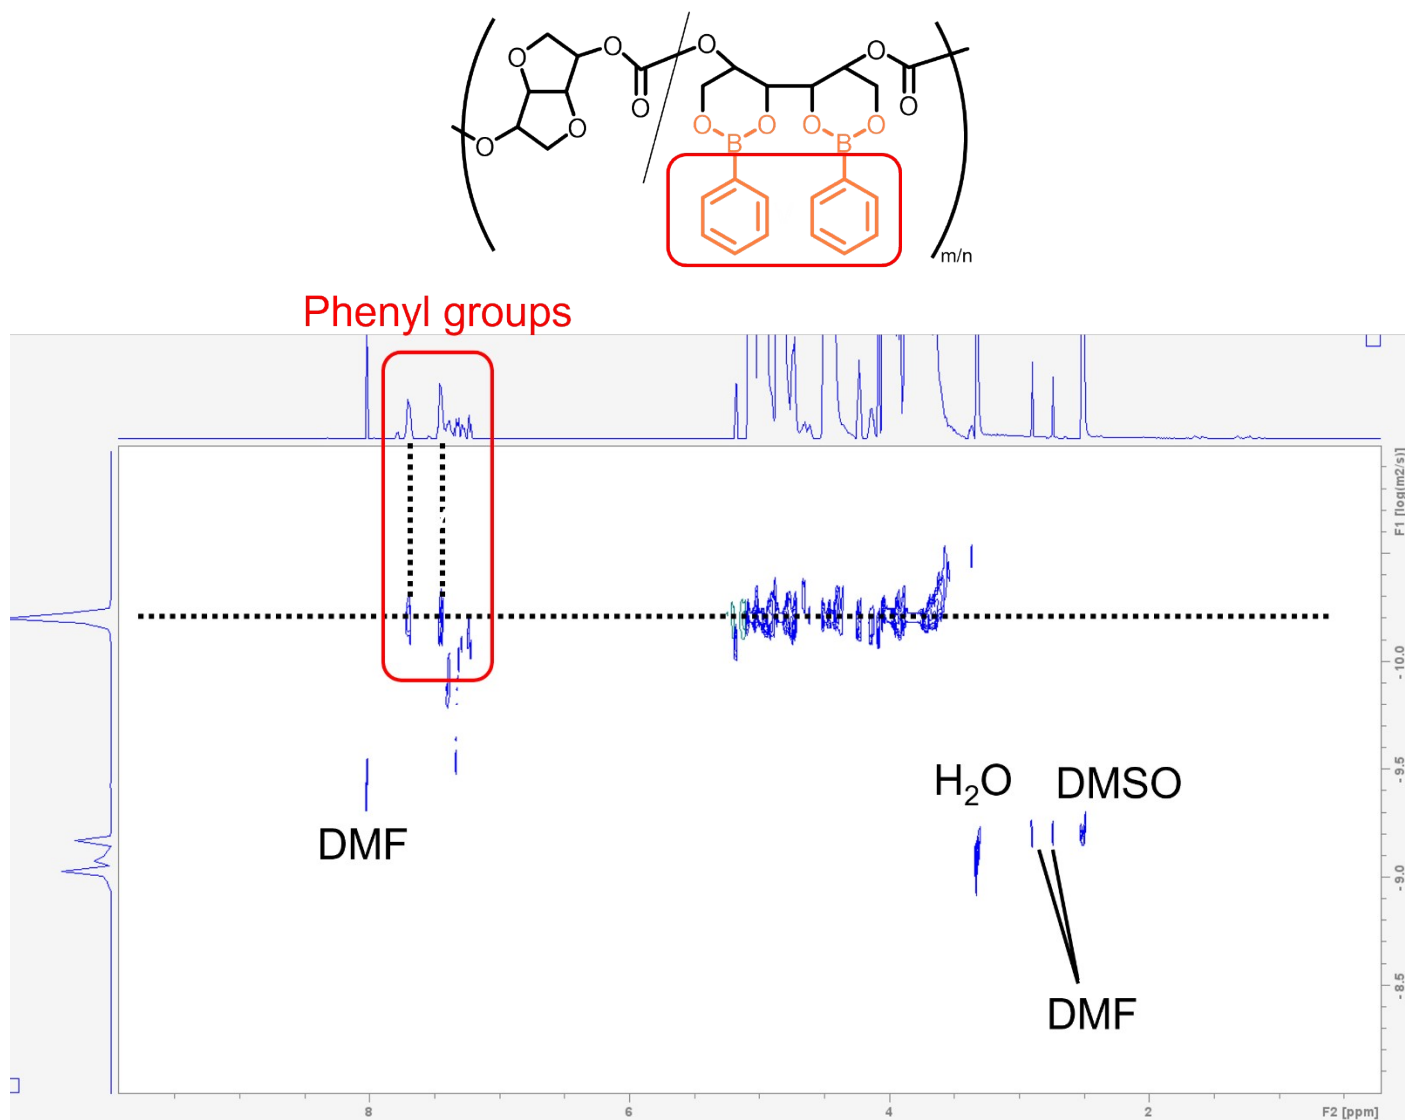

Figure S2. DOSY spectrum of P(IC-co-MC)PB (500 MHz, 25 °C, DMSO-*d*<sub>6</sub>).

### 3. Synthesis and deprotection of P(nBA-co-PB)

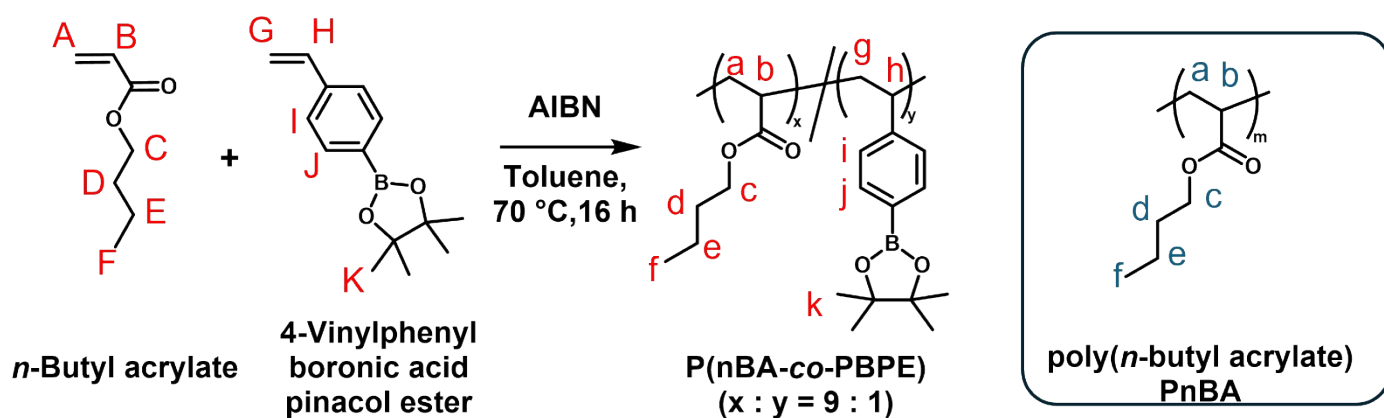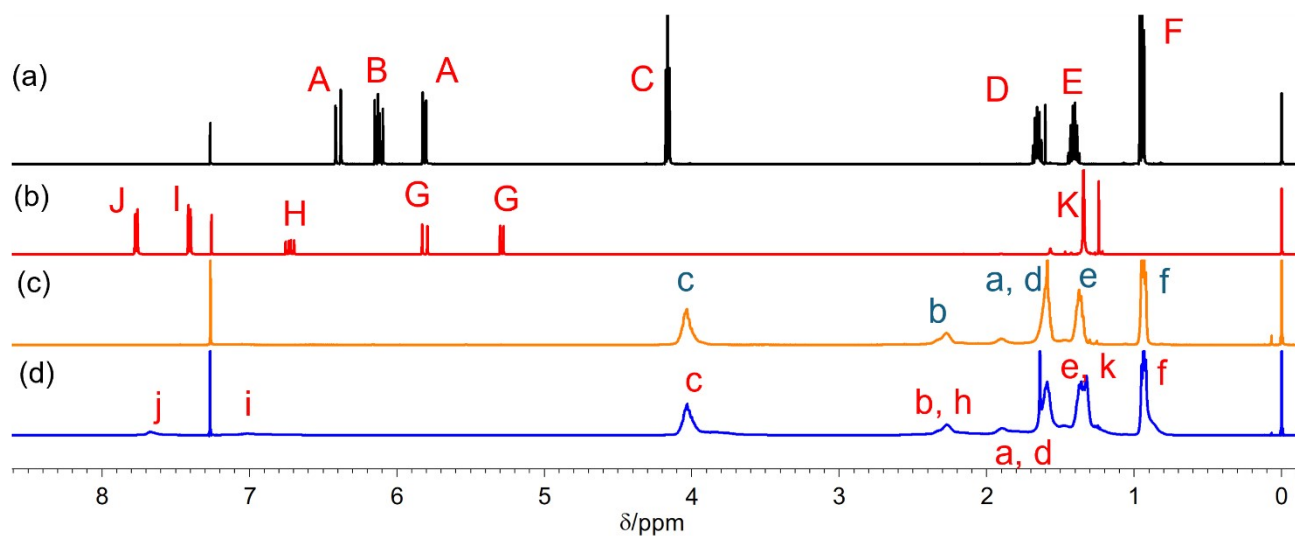

Figure S3.  $^1\text{H}$  NMR spectrum of (a)  $n$ -butyl acrylate, (b) 4-vinylphenylboronic acid pinacol ester, (c) poly( $n$ -butyl acrylate) (PnBA), and (d) P( $n$ BA-co-PBPE) (500 MHz, 25  $^\circ\text{C}$ ,  $\text{DMSO-}d_6$ ).

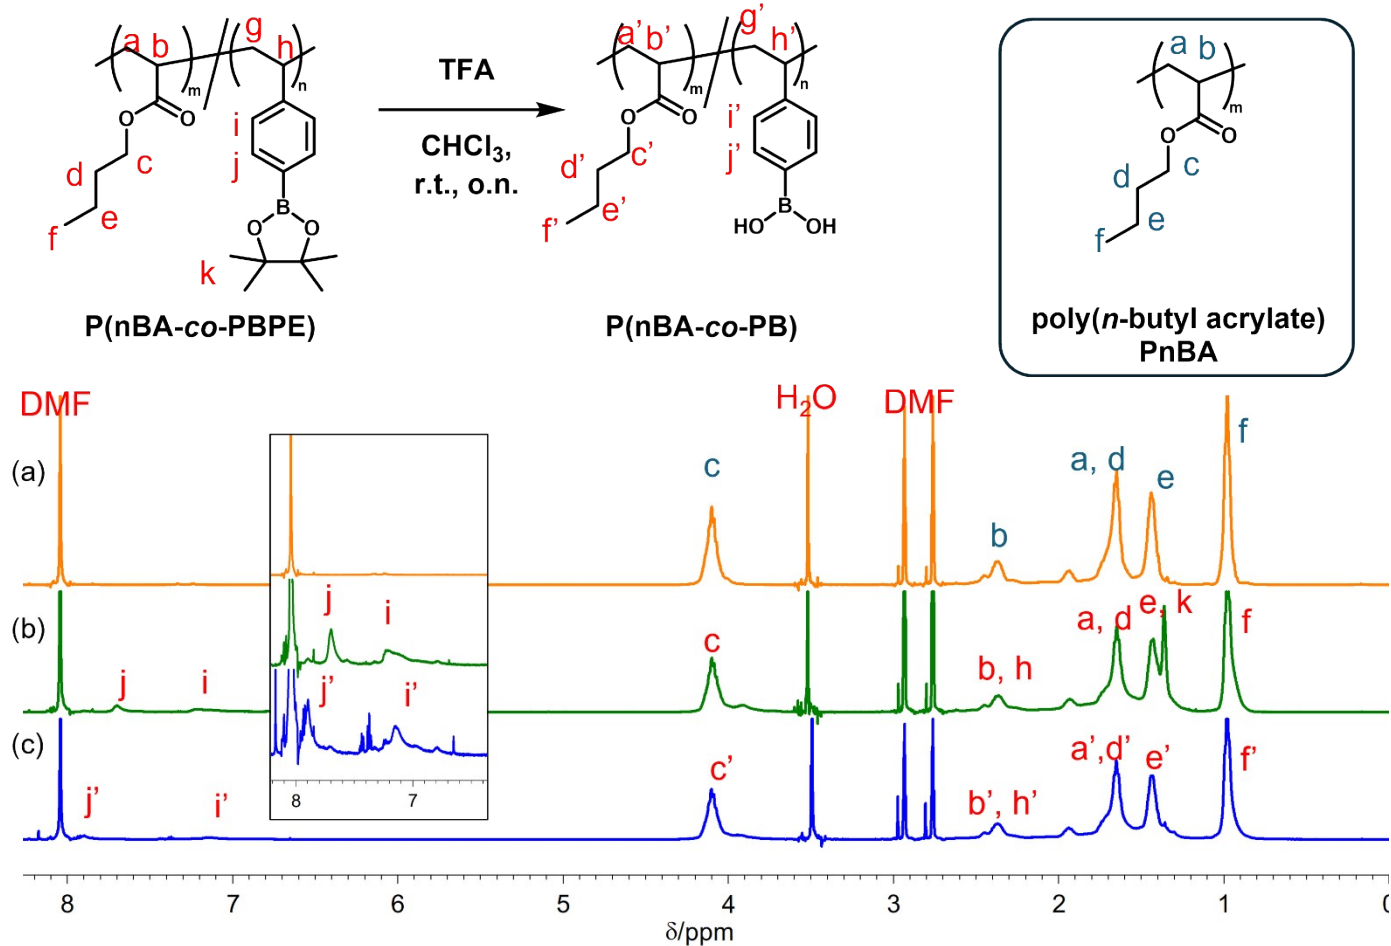

Figure S4. <sup>1</sup>H NMR spectrum of (a) **PnBA**, (b) **P(nBA-co-PBPE)**, and (c) **P(nBA-co-PB)** (500 MHz, 25 °C, DMF-*d*<sub>7</sub>).

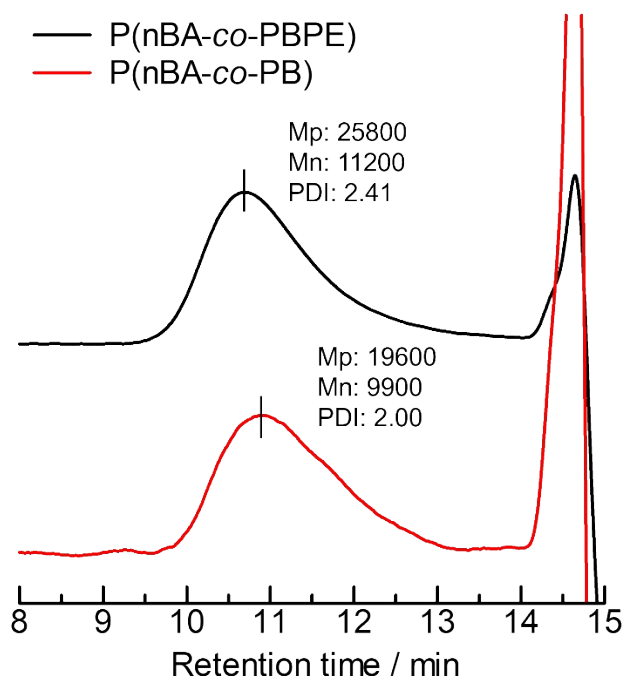

Figure S5. GPC profiles of **P(nBA-co-PBPE)**, and **P(nBA-co-PB)** (eluent: DMF, detector: RI, standard: polystyrene).

#### 4. Photo of processed polymers

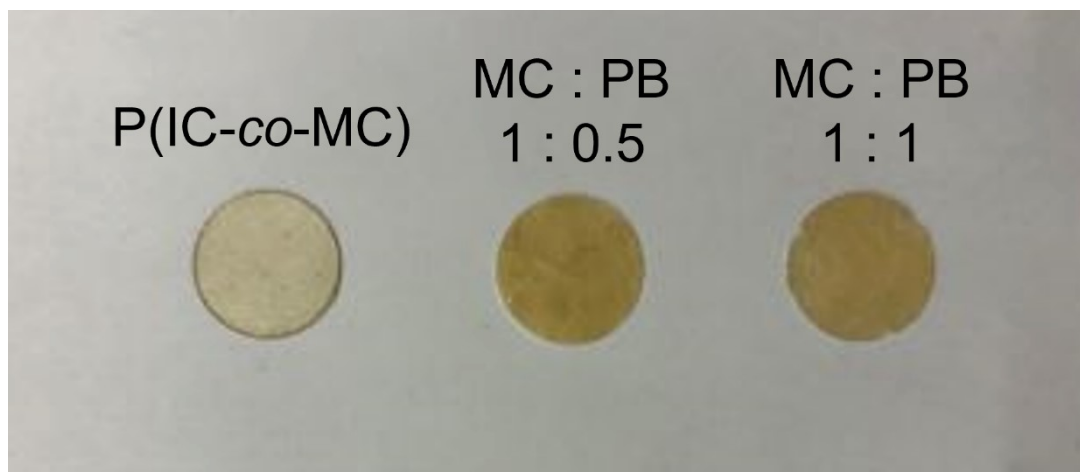

Figure S6. Photo of sample disks processed by hot-press method with MeltPrep VCM.

## 5. Thermal property of P(nBA-co-PB)

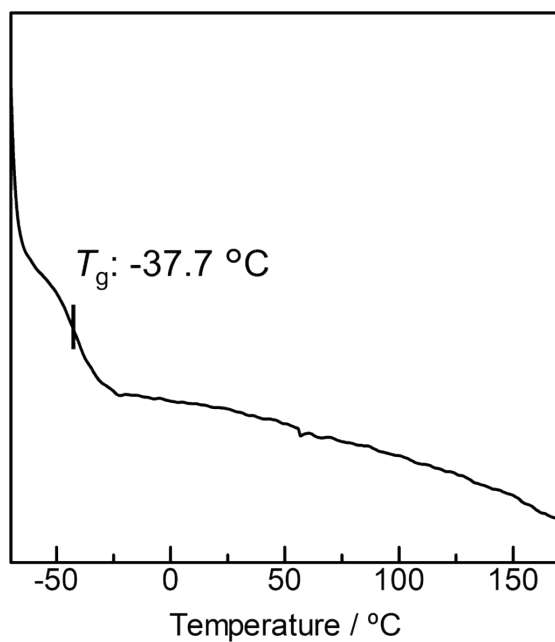

Figure S7. DSC curve of **P(nBA-co-PB)** carried out on a SHIMADZU DSC-60A Plus with a heating rate of  $10\text{ °C min}^{-1}$  under a flow of  $\text{N}_2$ .

## 6. Frequency dependence of $G'$ and $G''$

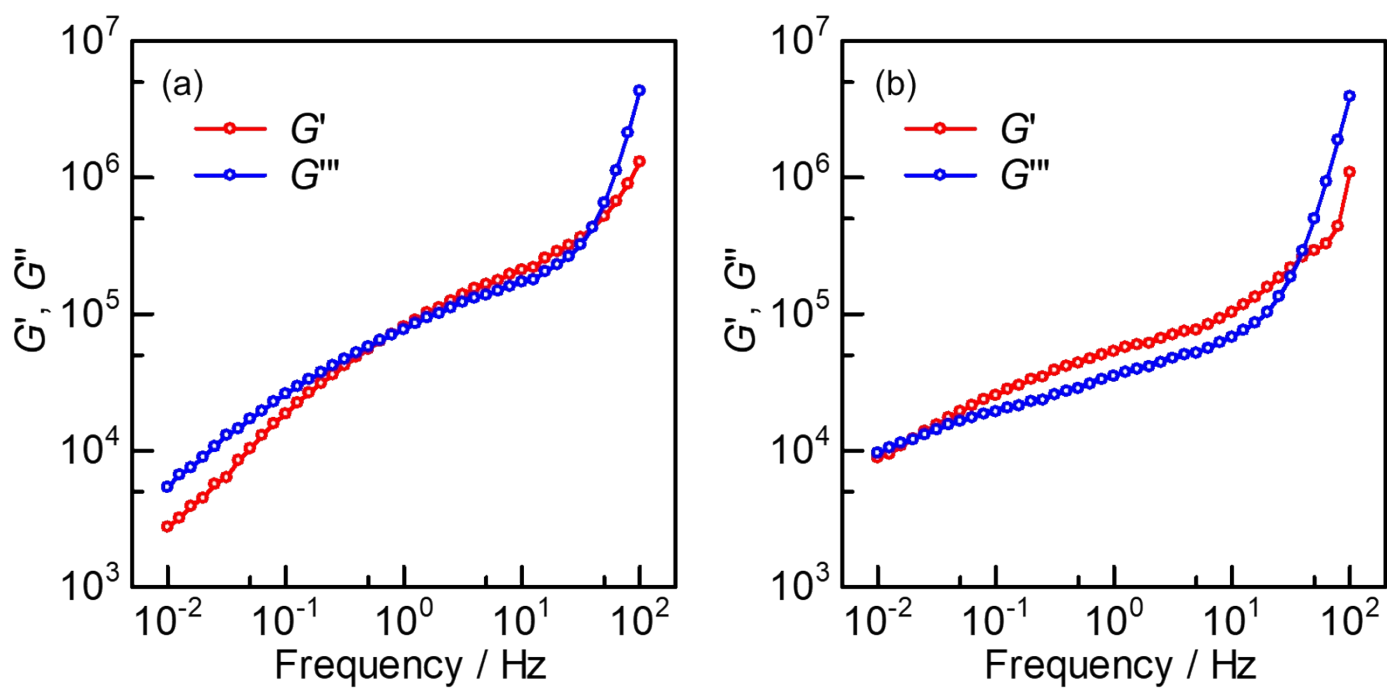

Figure S8. Frequency dependence of the polymer mixture at 140 °C. (a) MC:PB = 1: 0.5, (b) MC:PB = 1 : 1.



## 7. Ammonolysis of P(IC-co-MC) and P(IC-co-MC)PB at 30 °C

$$[M_p]_t / [M_p]_0 = \frac{[M_p]_t : \text{The peak top molecular weight at time "t".}}{[M_p]_0 : \text{The peak top molecular weight before the degradation reaction}}$$

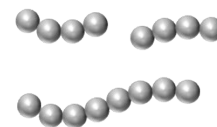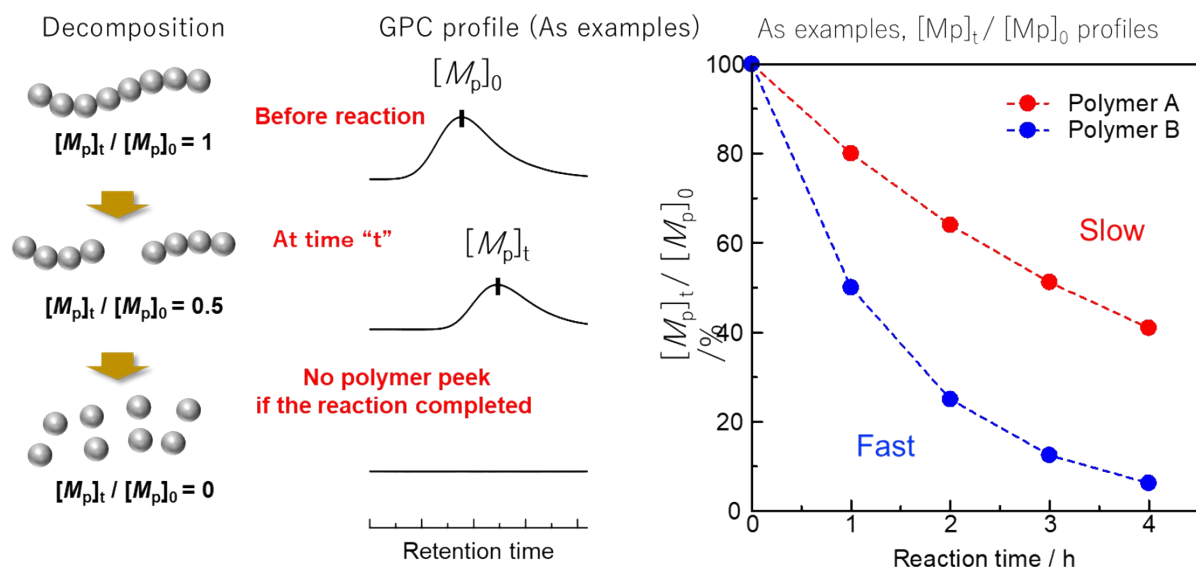

Figure S9. Plots of  $[M_p]_t / [M_p]_0$  as an example.

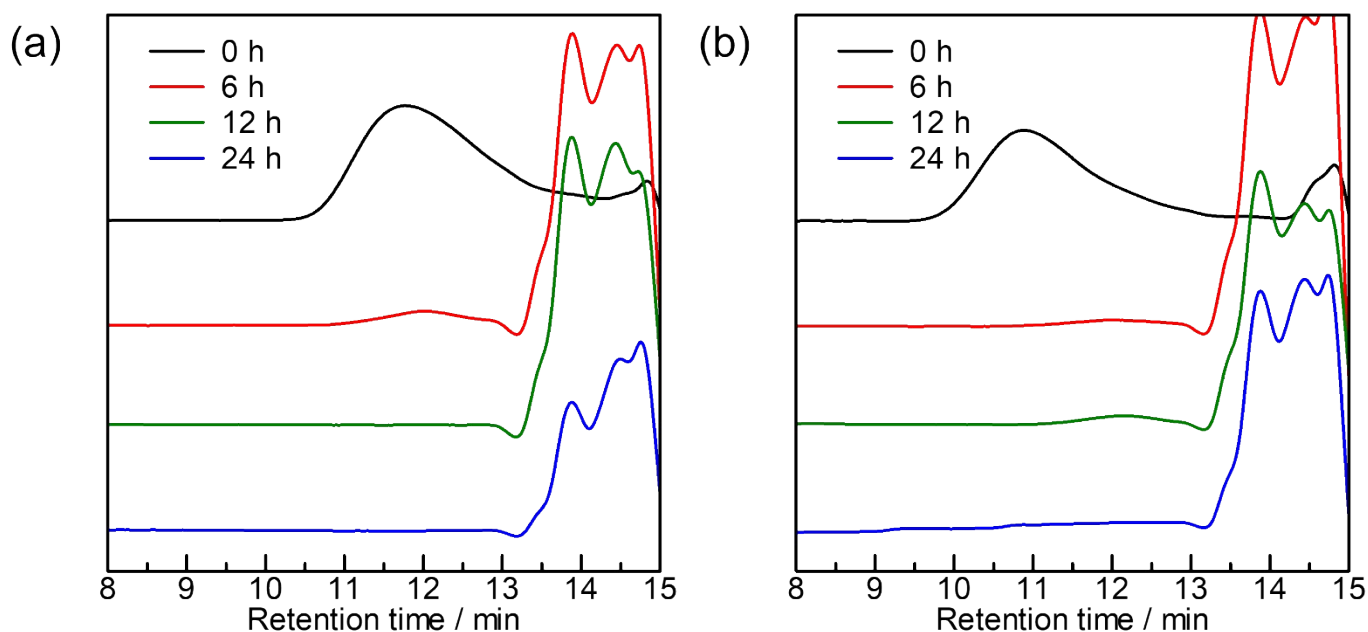

Figure S10. GPC profiles of the decomposition products of (a) **P(IC-co-MC)**, and (b) **P(IC-co-MC)PB** during the ammonolysis at 30 °C (eluent: DMF, detector: RI, standard: polystyrene)

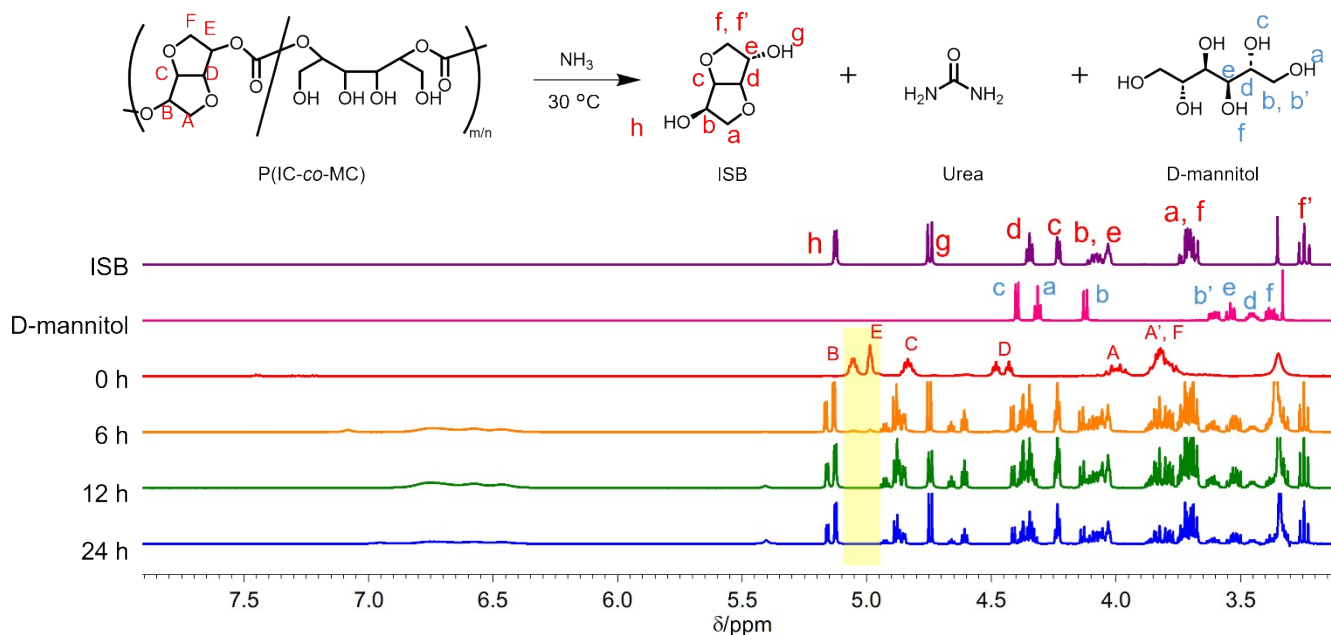

Figure S11. <sup>1</sup>H NMR spectra of **P(IC-co-MC)** before reaction 0 h (red) and after reaction at 6 h (orange), 12 h (green), and 24 h (blue) during the ammonolysis at 30 °C. The yellow highlighted peaks were derived from the polymer.

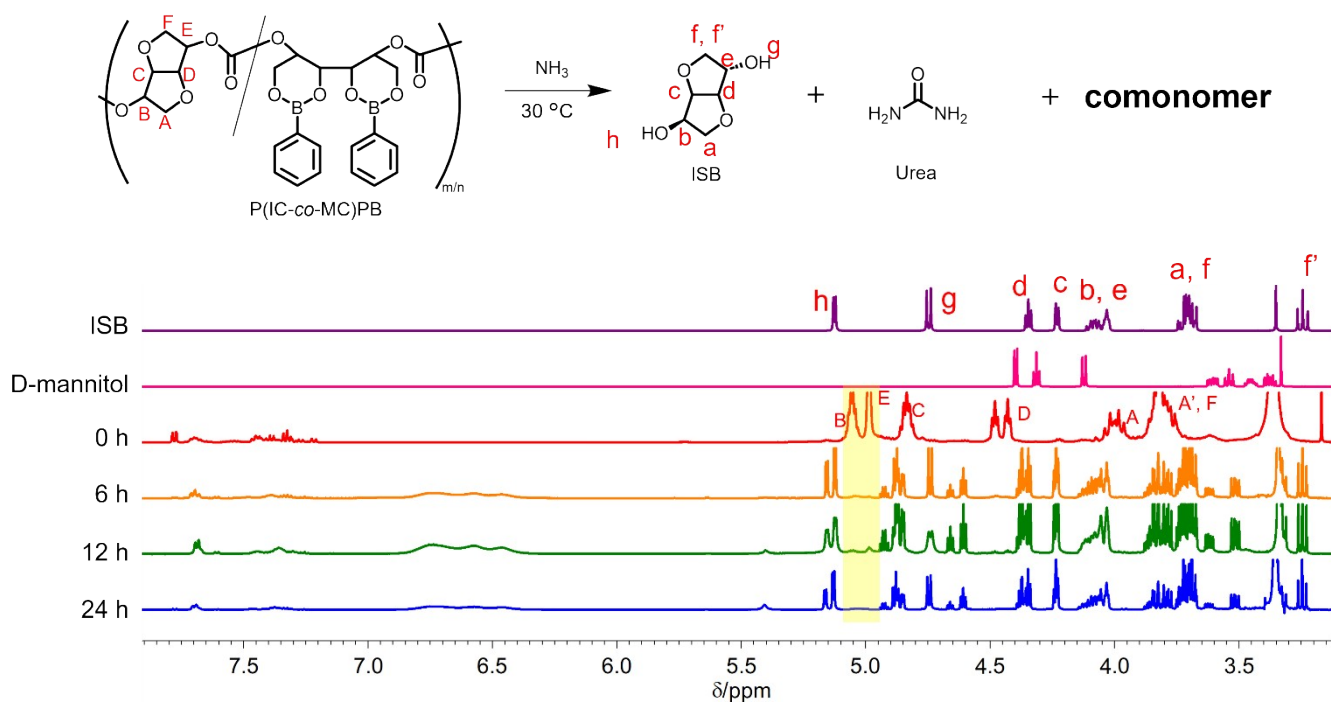

Figure S12. <sup>1</sup>H NMR spectra of **P(IC-co-MC)PB** before reaction 0 h (red) and after reaction at 6 h (orange), 12 h (green), and 24 h (blue) during the ammonolysis at 30 °C. The yellow highlighted peaks were derived from the polymer.

## 8. DOSY spectrum of the decomposed P(IC-co-MC)PDB

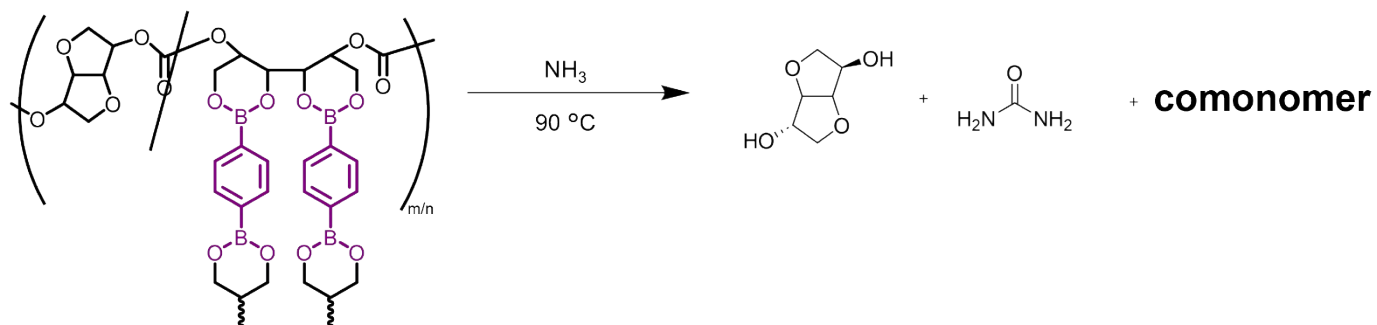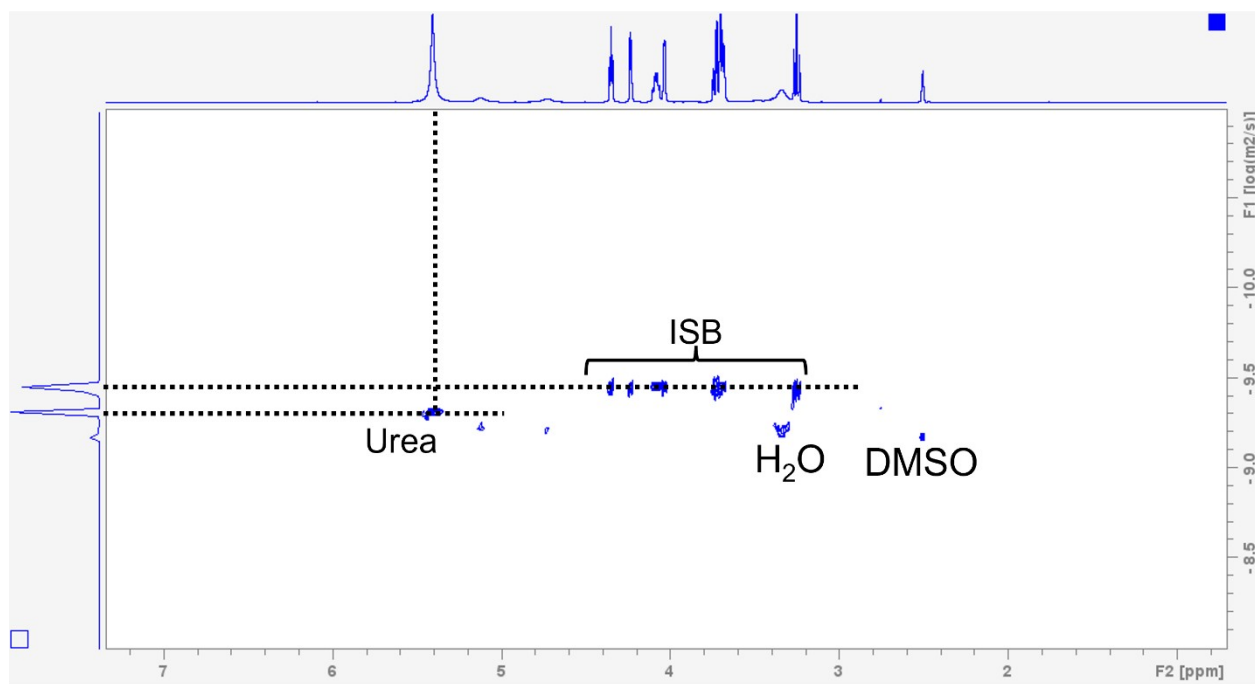

Figure S13. DOSY spectrum of the decomposition product of **P(IC-co-MC)PDB** after the ammonolysis at  $90\text{ }^\circ\text{C}$  (500 MHz,  $25\text{ }^\circ\text{C}$ ,  $\text{DMSO-}d_6$ ).

## 9. $^1\text{H}$ NMR spectrum of decomposition product of polymer mixture

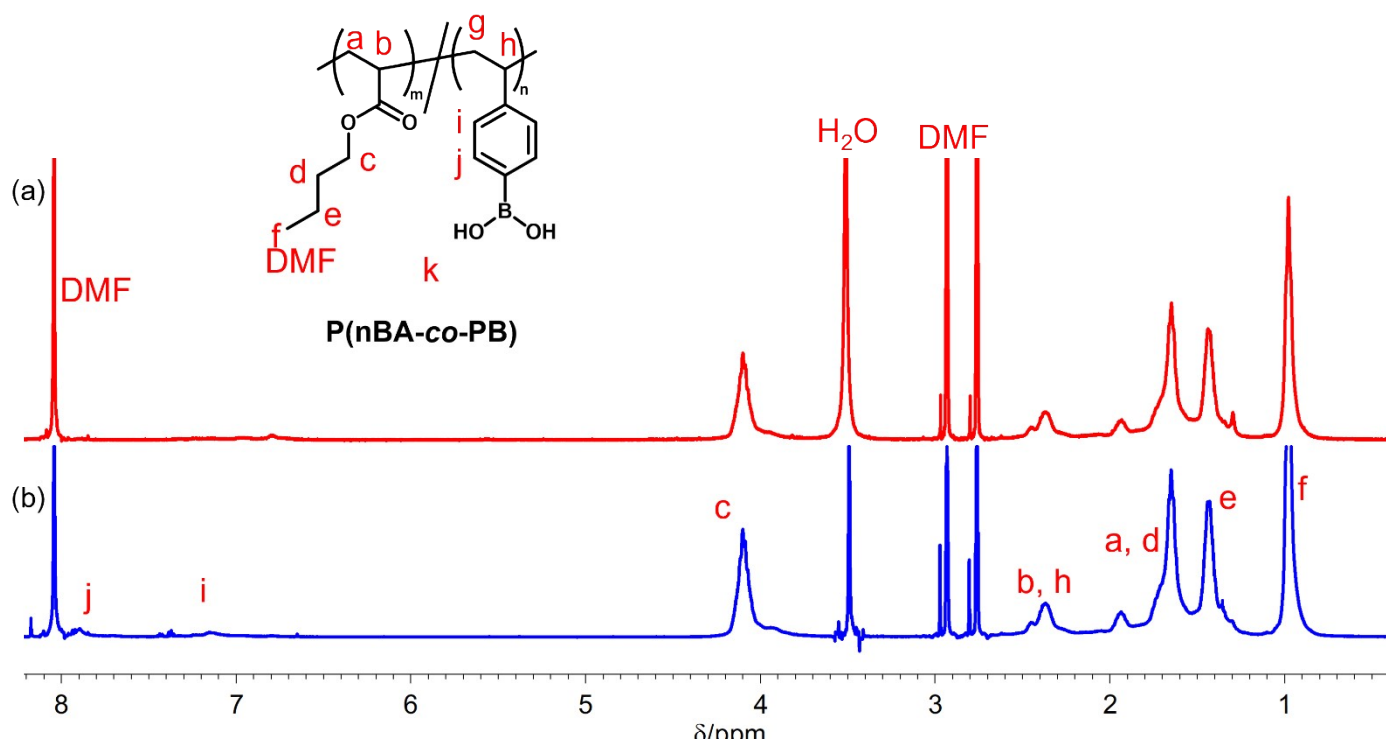

Figure S14.  $^1\text{H}$  NMR spectra of (a) water insoluble part of the decomposition product and (b) original  $\text{P}(\text{nBA-co-PB})$  (500 MHz, 25  $^\circ\text{C}$ ,  $\text{DMF-d}_7$ )
